# Supplementary material for: Breastfeeding Practice and Association between Characteristics and Experiences of Mothers Living in Bangkok
Source: MDPI journal article supplement (doi:10.3390/ijerph18157889), 2021-07-26
Supplement: s1 [file s1]

## Supplementary file

**Table S1. The full list of hospitals and health centers with a corresponding number of samples acquired.**

| Health facilities | Number | Freq. | Percent | Cum.  |
|-------------------|--------|-------|---------|-------|
| Hospital          | 1      | 195   | 28.85   | 28.85 |
| Hospital          | 2      | 63    | 9.32    | 38.17 |
| Hospital          | 3      | 22    | 3.25    | 41.42 |
| Hospital          | 4      | 19    | 2.81    | 44.23 |
| Hospital          | 5      | 45    | 6.66    | 50.89 |
| Hospital          | 6      | 43    | 6.36    | 57.25 |
| Hospital          | 7      | 51    | 7.54    | 64.79 |
| Hospital          | 8      | 71    | 10.50   | 75.29 |
| Health Center     | 1      | 1     | 0.15    | 75.44 |
| Health Center     | 2      | 7     | 1.04    | 76.48 |
| Health Center     | 3      | 19    | 2.81    | 79.29 |
| Health Center     | 4      | 1     | 0.15    | 79.44 |
| Health Center     | 5      | 9     | 1.33    | 80.77 |
| Health Center     | 6      | 4     | 0.59    | 81.36 |
| Health Center     | 7      | 14    | 2.07    | 83.43 |
| Health Center     | 8      | 39    | 5.77    | 89.20 |
| Health Center     | 9      | 4     | 0.59    | 89.79 |
| Health Center     | 10     | 2     | 0.30    | 90.09 |
| Health Center     | 11     | 20    | 2.96    | 93.05 |
| Health Center     | 12     | 1     | 0.15    | 93.20 |
| Health Center     | 13     | 45    | 6.66    | 99.85 |
| Health Center     | 14     | 1     | 0.15    | 100   |
